# Supplementary material for: Improving all ternary small-molecule organic solar cells by optimizing short wavelength photon harvesting and exciton dissociation based on a bisadduct analogue of [70]PCBM as a third component material
Source: Royal Society of Chemistry journal article supplement (doi:10.1039/d1se01777b), 2021-12-14
Supplement: d1se01777b1.pdf [file d1se01777b1.pdf]

## Supplementary Material

# Improving All Ternary Small-Molecule Organic Solar Cells by Optimizing Short Wavelength Photon Harvesting and Exciton Dissociation based on a Bisadduct analogue of [70]PCBM as a Third Component Materials

Zhiyong Liu<sup>abc\*</sup> and Hong-En Wang<sup>abc\*</sup>

<sup>a</sup>Institute of Physics and Electronic Information, Yunnan Normal University, Kunming 650500, China.

<sup>b</sup>Yunnan Key Laboratory of Optoelectronic Information Technology, Kunming 650500, China.

<sup>c</sup>Key Laboratory of Advanced Technique & Preparation for Renewable Energy Materials, Ministry of Education, Yunnan Normal University, Kunming 650500, China.

\*Corresponding authors: ([zhiyongliu1982@hotmail.com](mailto:zhiyongliu1982@hotmail.com) (Z.Y Liu); [hongenwang@hotmail.com](mailto:hongenwang@hotmail.com) (H.E Wang))

## Experimental section

Materials: BTR and Y6 were purchased from Solarmer Materials, Inc. BisPC<sub>71</sub>BM and PC<sub>71</sub>BM was purchased from Luminescence Technology Co. *o*-Dichlorobenzene (ODCB) was purchased from Sigma-Aldrich Co. MoO<sub>3</sub> and Ag were purchased from Alfa Aesar Co. The BTR and the blend of Y6 and third component materials were dissolved in ODCB. The BTR:Y6 ratio was 1:1 (the total concentration was 20 mg mL<sup>-1</sup>), and the bisPC<sub>71</sub>BM and PC<sub>71</sub>BM content was changed according to the measurement. The photoactive layer solution with the solvent additive of 1-chloronaphthalene (CN) (0.5%, v/v). The ZnO solution was synthesized by a sol-gel method [1, 2].

Device Fabrication: The ITO glass substrates (10 Ω per square) are clean via sequential sonication in detergent, deionized water and ethanol and then blow-dried with high-purity nitrogen. Subsequently, a ZnO solution was spin-coated on ITO substrates at 2000 rounds per min (RPM) for 40 s and dried at 150 °C for 2 min in atmospheric air. Then, ZnO/ITO substrates are transfer into a high-purity nitrogen-filled glove box. The photoactive solution was spin-coated onto the ZnO/ITO substrates at 1500 RPM for 40 s to prepare the photoactive layers, and thermally annealed at 120°C for 5 min. Finally, the MoO<sub>3</sub> layer and Ag electrode are deposit by thermal evaporation. The photoactive area, defined by the overlapping area of the ITO cathode and Ag anode, was approximately 9 mm<sup>2</sup> (3×3 mm).

Device Measurement: AM 1.5G irradiation was provided by an XES-40S2 (SAN-EI ELECTRIC Co., Ltd) solar simulator (AAA grade, 5.0×5.0 cm<sup>2</sup> photobeam size)

with a light intensity of 100 mW cm<sup>-2</sup>. The current density-voltage ( $J$ - $V$ ) curves of all the OSCs were measured by a Keithley 2400 unit in a high-purity nitrogen-filled glove box. The absorption spectra of the films are measured with a Shimadzu UV-3101 PC spectrometer.

The  $R_S$  and  $R_{SH}$  are calculated according to the below expressions [3, 4]:

$$\left(\frac{dI}{dV}\right)_{I=0} = \frac{1}{R_S}$$

$$\left(\frac{dI}{dV}\right)_{V=0} = \frac{1}{R_{SH}}$$

The  $J$ - $V$  curves under  $I = 0$  and  $V = 0$  are defined as the  $R_S$  and  $R_{SH}$  value. When  $R_S = 0$  and  $R_{SH} \rightarrow \infty$ , which is corresponding to the  $FF = 1$ .

The crystallinity is related by Bragg's law [5, 6]:

$$\lambda = 2d \sin \theta$$

where  $\lambda$  is the wavelength of X-ray radiation (0.154 nm),  $\theta$  is the peak position half angle and  $d$  is the inter-planar distance. The angles at which the peak intensities occur are related to the donor and acceptor molecule inter-planar distances of the thin films.

**Table S1.** The dependence of the  $V_{OC}$ , LUMO levels, energy bandgap and energy loss on the ratio of Y6:bisPC<sub>71</sub>BM and Y6:PC<sub>71</sub>BM.

| Y6:<br>bisPC <sub>71</sub> BM | $V_{OC}$<br>(V) | $E_{LUMO}$<br>(eV) | $E_{HOMO}$<br>(eV) | $E_g$<br>(eV) | $E_{loss}$<br>(eV) |
|-------------------------------|-----------------|--------------------|--------------------|---------------|--------------------|
| 1:0                           | 0.860           | -4.100             | -5.650             | 1.240         | 0.380              |
| 1:0.1                         | 0.888           | -4.038             | -5.639             | 1.302         | 0.414              |
| 1:0.15                        | 0.899           | -4.010             | -5.634             | 1.330         | 0.430              |
| 1:0.2                         | 0.916           | -3.984             | -5.629             | 1.356         | 0.440              |
| 1:0.25                        | 0.923           | -3.959             | -5.625             | 1.381         | 0.458              |
| 1:0.3                         | 0.938           | -3.935             | -5.621             | 1.405         | 0.467              |
| 0:1                           | 1.040           | -3.700             | -5.460             | 1.640         | 0.600              |

| Y6:<br>PC <sub>71</sub> BM | $V_{OC}$<br>(V) | $E_{LUMO}$<br>(eV) | $E_{HOMO}$<br>(eV) | $E_g$<br>(eV) | $E_{loss}$<br>(eV) |
|----------------------------|-----------------|--------------------|--------------------|---------------|--------------------|
| 1:0                        | 0.860           | -4.100             | -5.650             | 1.240         | 0.380              |
| 1:0.1                      | 0.870           | -4.088             | -5.660             | 1.252         | 0.382              |
| 1:0.15                     | 0.880           | -4.077             | -5.664             | 1.263         | 0.383              |
| 1:0.2                      | 0.888           | -4.067             | -5.669             | 1.273         | 0.385              |
| 1:0.25                     | 0.895           | -4.058             | -5.673             | 1.282         | 0.387              |
| 1:0.3                      | 0.901           | -4.050             | -5.677             | 1.290         | 0.389              |
| 0:1                        | 0.940           | -3.980             | -5.870             | 1.360         | 0.420              |

**Table S2.** Summary of the molecular weight,  $n$ ,  $l$ , and  $N_e$  values of Y6, bisPC<sub>71</sub>BM and PC<sub>71</sub>BM.

| Electron<br>Acceptor   | Molecular<br>Weight (g mol <sup>-1</sup> ) | $n$<br>(mol g <sup>-1</sup> ) | $l$ | $N_e$<br>(mol g <sup>-1</sup> ) | $E_{LUMO}$<br>(eV) |
|------------------------|--------------------------------------------|-------------------------------|-----|---------------------------------|--------------------|
| Y6                     | 1451                                       | $4.15 \times 10^{20}$         | 1   | $4.15 \times 10^{20}$           | -4.10              |
| bisPC <sub>71</sub> BM | 887                                        | $6.79 \times 10^{20}$         | 1   | $6.79 \times 10^{20}$           | -3.70              |
| PC <sub>71</sub> BM    | 680                                        | $8.85 \times 10^{20}$         | 1   | $8.85 \times 10^{20}$           | -3.98              |

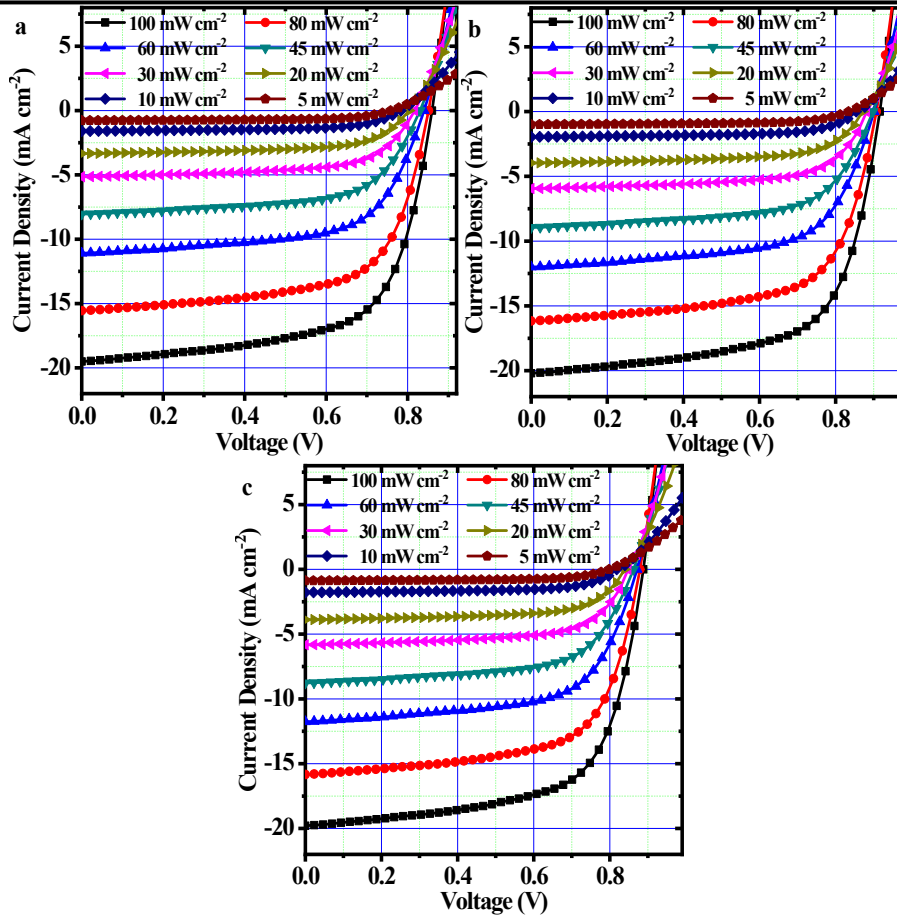

**Figure S1.** Dependence of the  $J$ - $V$  characteristics on different light intensities (from

100 mW cm<sup>-2</sup> to 5 mW cm<sup>-2</sup>) for the BTR:Y6 binary PSCs, BTR:Y6:bisPC<sub>71</sub>BM and BTR:Y6:PC<sub>71</sub>BM-based optimized ternary PSC, corresponding to Figure S1(a), S1(b) and S1(c), respectively.

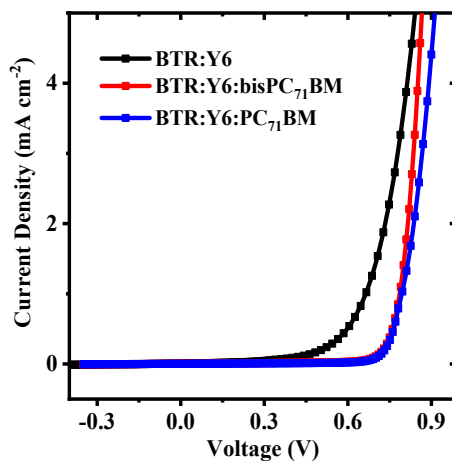

**Figure S2.** The dark current density of the BTR:Y6 binary PSCs, BTR:Y6:bisPC<sub>71</sub>BM and BTR:Y6:PC<sub>71</sub>BM optimized ternary PSCs.

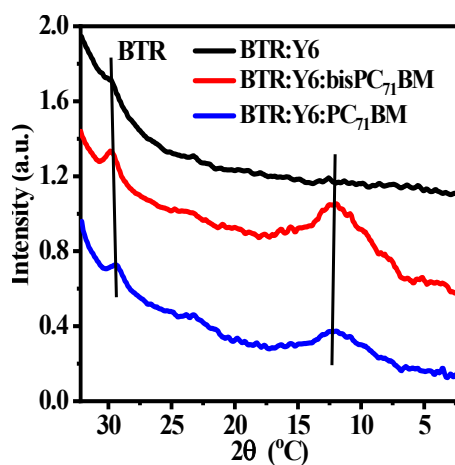

**Figure S3.** The XRD curves of the BTR:Y6 binary films, BTR:Y6:bisPC<sub>71</sub>BM and BTR:Y6:PC<sub>71</sub>BM optimized ternary film.

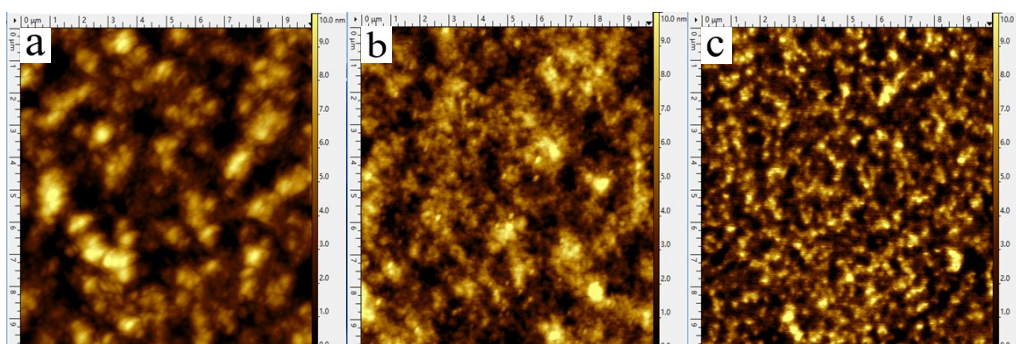

**Figure S4.** AFM images of the BTR:Y6 binary films, BTR:Y6:bisPC<sub>71</sub>BM and BTR:Y6:PC<sub>71</sub>BM optimized ternary film (a, b, c respectively).

## Reference:

- [1] W. Yu, L. Huang, D. Yang, P. Fu, L. Zhou, J. Zhang, C. Li, Efficiency exceeding 10% for inverted polymer solar cells with a ZnO/ionic liquid combined cathode interfacial layer, *Journal of Materials Chemistry A*, 3 (2015) 10660-10665.
- [2] U. Galan, Y. Lin, G.J. Ehlert, H.A. Sodano, Effect of ZnO nanowire morphology on the interfacial strength of nanowire coated carbon fibers, *Composites Science and Technology*, 71 (2011) 946-954.
- [3] F. Ghani, M. Duke, J. Carson, Numerical calculation of series and shunt resistances and diode quality factor of a photovoltaic cell using the Lambert W-function, *Solar Energy*, 91 (2013) 422-431.
- [4] P.A. Chate, P.P. Hankare, D.J. Sathe, n-Type polycrystalline (CdZn)Se photoelectrode synthesis and its photoelectrochemical characterizations, *Journal of Alloys and Compounds*, 506 (2010) 673-677.
- [5] A. Kulkarni, K.H. Schulz, T. Lim, M. Khan, Dependence of the sheet resistance of indium-tin-oxide thin films on grain size and grain orientation determined from X-ray diffraction techniques, *Thin solid films*, 345 (1999) 273-277.
- [6] D. Zhao, W. Ke, C.R. Grice, A.J. Cimaroli, X. Tan, M. Yang, R.W. Collins, H. Zhang, K. Zhu, Y. Yan, Annealing-free efficient vacuum-deposited planar perovskite solar cells with evaporated fullerenes as electron-selective layers, *Nano Energy*, 19 (2016) 88-97.
- [7] Y. Huo, X.-T. Gong, T.-K. Lau, T. Xiao, C. Yan, X. Lu, G. Lu, X. Zhan, H.-L. Zhang, Dual-Accepting-Unit Design of Donor Material for All-Small-Molecule Organic Solar Cells with Efficiency Approaching 11%, *Chemistry of Materials*, 30 (2018) 8661-8668.
- [8] C. Xu, J. Wang, Q. An, X. Ma, Z. Hu, J. Gao, J. Zhang, F. Zhang, Ternary small molecules organic photovoltaics exhibiting 12.84% efficiency, *Nano Energy*, 66 (2019) 104119-104127.
- [9] Z. Zhou, S. Xu, J. Song, Y. Jin, Q. Yue, Y. Qian, F. Liu, F. Zhang, X. Zhu, High-efficiency small-molecule ternary solar cells with a hierarchical morphology enabled by synergizing fullerene and non-fullerene acceptors, *Nature Energy*, 3 (2018) 952-959.
- [10] Z. Liu, N. Wang, All small molecule ternary organic photovoltaic with two well compatible nonfullerene acceptors for minimizing energy loss, *Solar Energy*, 214 (2021) 110-118.
- [11] Z. Liu, N. Wang, Efficient ternary all small molecule organic photovoltaics with NC70BA as third component materials, *Dyes and Pigments*, 187 (2021) 109111.
- [12] D. Hu, Q. Yang, H. Chen, F. Wobben, V.M. Le Corre, R. Singh, T. Liu, R. Ma, H. Tang, L.J.A. Koster, T. Duan, H. Yan, Z. Kan, Z. Xiao, S. Lu, 15.34% Efficiency All-Small-Molecule Organic Solar Cells with Improved Fill Factor Enabled by A Fullerene Additive, *Energy & Environmental Science*, 13 (2020) 2134-2141.
- [13] M. Jiang, H. Bai, H. Zhi, L. Yan, H.Y. Woo, L. Tong, J.-L. Wang, F. Zhang, Q. An, Rational compatibility in ternary matrix enables all-small-molecule organic solar cells with over 16% efficiency, *Energy & Environmental Science*, n/a (2021) n/a.
